# Supplementary material for: Differential Metabolism of Glycerol Based on Oral versus Intravenous Administration in Humans
Source: MDPI journal article supplement (doi:10.3390/metabo12100890), 2022-09-22
Supplement: s1 [file s1]

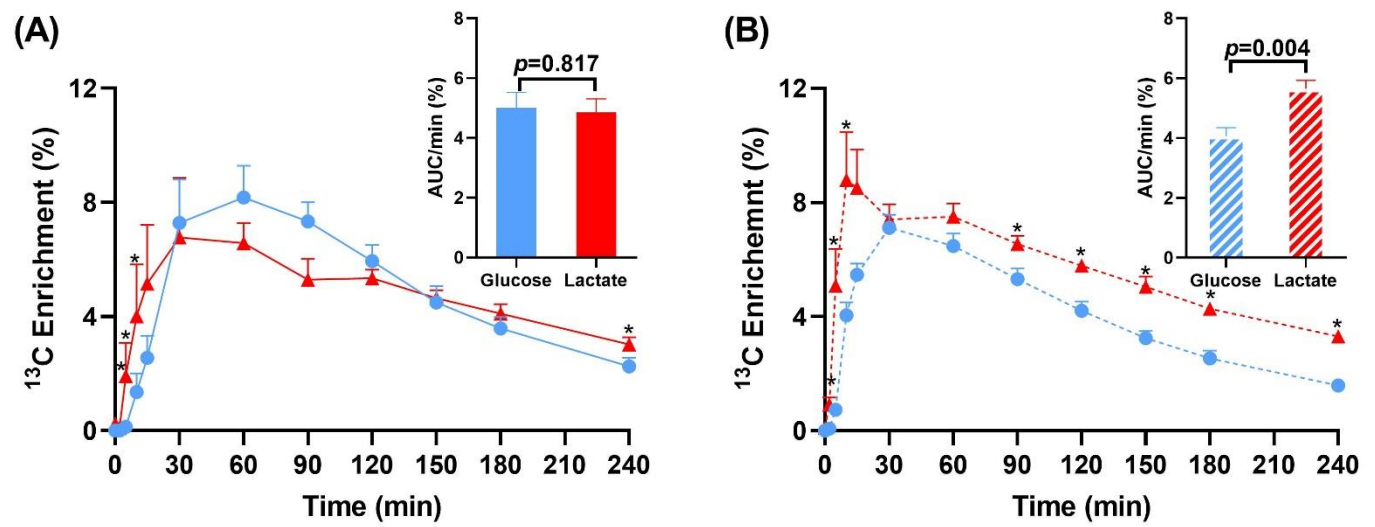

**Supplementary Figure S1.**  $^{13}\text{C}$ -enrichment data of glucose (blue) and lactate (red) after oral (A) and intravenous (B)  $^{13}\text{C}_3$ -glycerol administration. Inset graphs with the area under the curve (AUC) data. \* $p < 0.05$  via paired t-test or Wilcoxon sign-rank test between oral and intravenous administration.  $n = 8$ .
